Development 138, 179 (2011) doi:10.1242/dev.062299

## Id2a influences neuron and glia formation in the zebrafish retina by modulating retinoblast cell cycle kinetics

**Rosa A. Uribe and Jeffrey M. Gross**

An error was published in *Development* **137**, 3763-3774.

On p. 3764, the Id2a morpholino sequences were incorrect. The correct sequences are:

Id2a-MO, 5'-GCCTTCATGTTGACAGCAGGAT**TC**3'; and Id2a-MM, 5'-GCGTTGATGTT**CACAGCACGAATTC**-3'.

The nucleotides in bold differ from the published ones.

The authors apologise to readers for this mistake.
